# Supplementary material
Source: PubMed Central journal article supplement (PMC4886613)

MRR055-03-33-D

Archive directory: /export/home/mradwan/vnmr.sys/data  
Sample directory:  
File: PROTON

Pulse Sequence: s2pul  
Solvent: CDC13  
Ambient temperature  
Mercury-400BB "unknown"

Relax. delay 1.000 sec  
Pulse 45.0 degrees  
Acq. time 1.992 sec  
Width 6410.3 Hz  
48 repetitions  
OBSERVE HI, 400.1252176 MHz  
DATA PROCESSING  
FT size 32768  
Total time 2 min, 30 sec

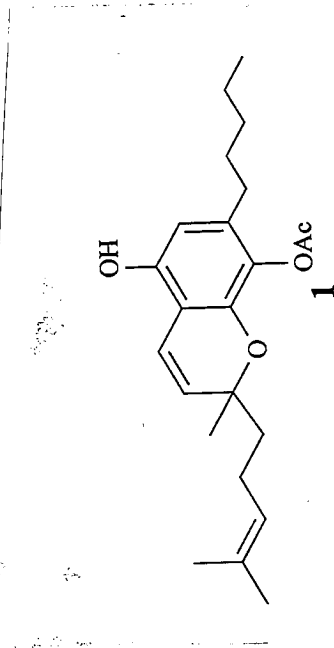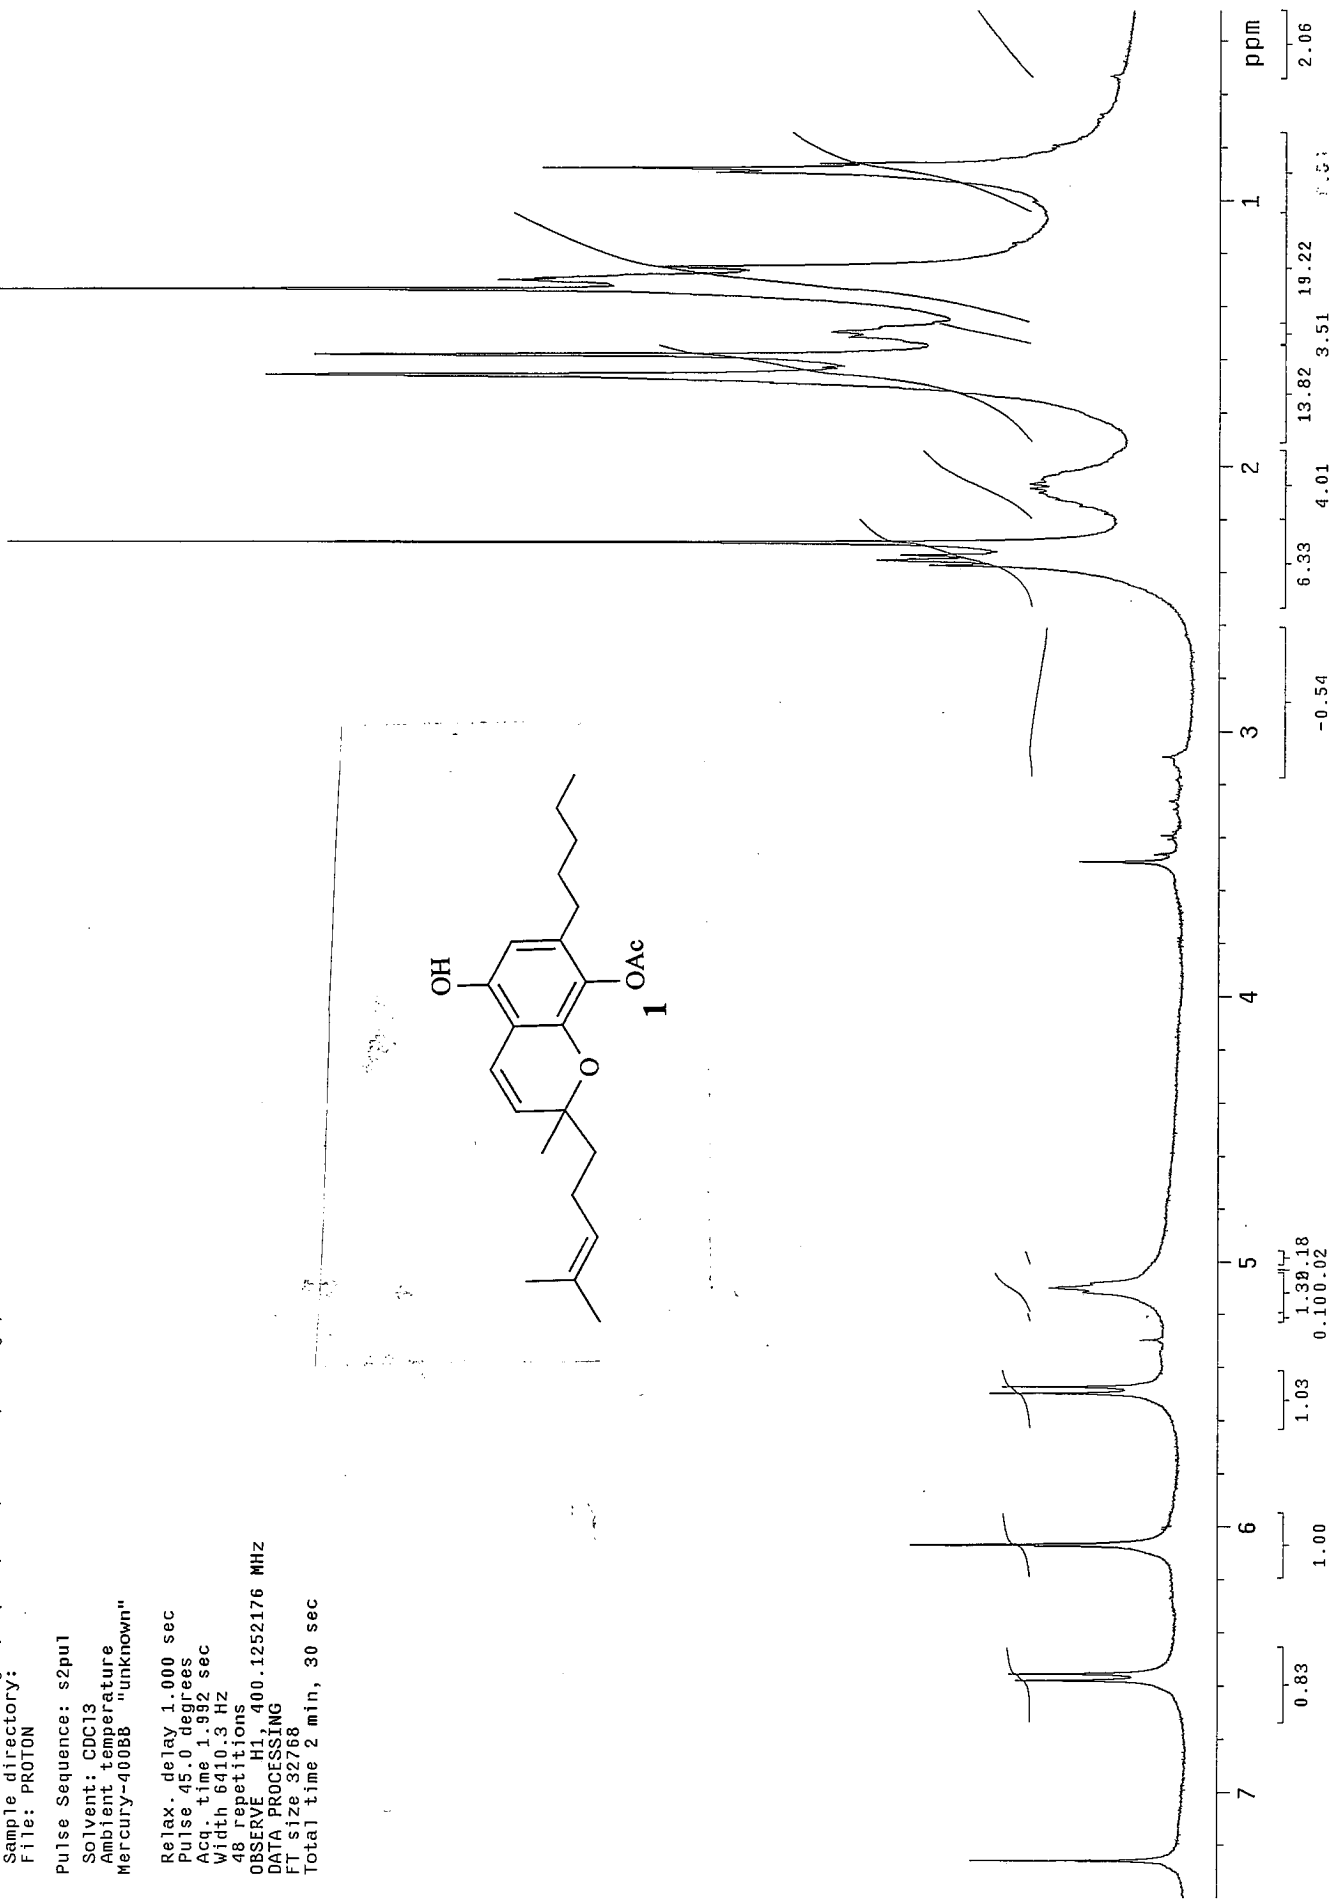

MRR055-03-33-D

Archive directory: /export/home/mradwan/vnmrSYS/data  
Sample directory:  
File: CARBON

Pulse Sequence: s2pu1  
Solvent: CDCl3  
Ambient temperature  
Mercury-400BB "unknown"

Relax. delay 1.000 sec  
Pulse 45.0 degrees  
Acq. time 1.189 sec  
Width 25125.6 Hz  
5896 repetitions  
OBSERVE C13, 100.6115420 MHz  
DECOUPLE H1, 400.1272240 MHz  
Power 36 dB  
continuously on  
WALTZ-16 modulated  
DATA PROCESSING  
Line broadening 1.0 Hz  
FT size 65536  
Total time 3 hr, 48 min, 56 sec

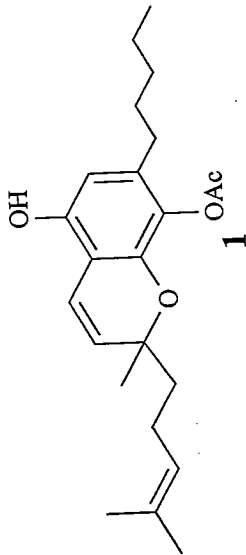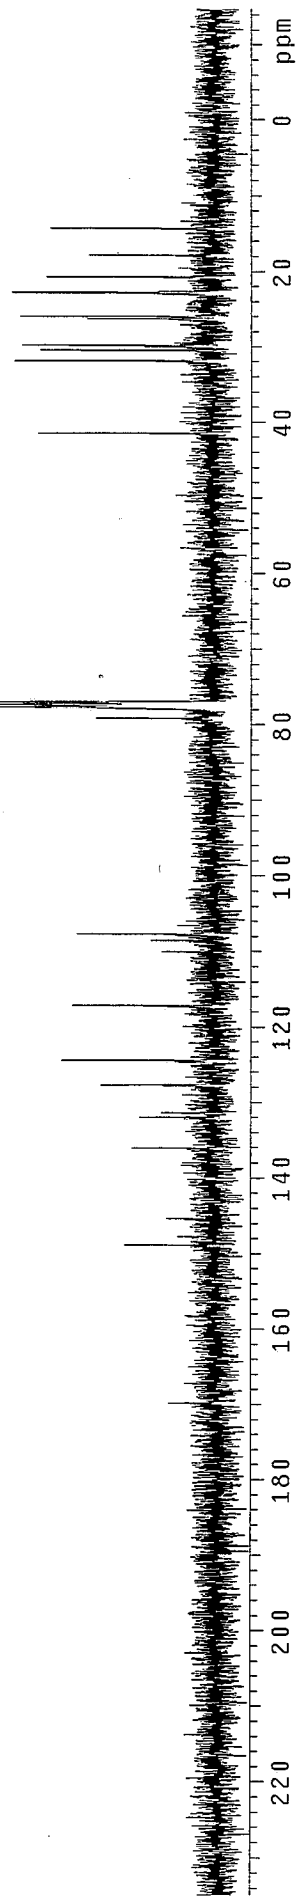

MRROSS-02-56-e-f-5

Archive directory: /export/home/mradwan/vnmr/sys/data  
Sample directory:  
File: PROTON

Pulse Sequence: s2pu1

Solvent: CDC13  
Temp. 30.0 C / 303.1 K  
Mercury-400BB "unknown"

Relax. delay 1.000 sec  
Pulse 45.0 degrees  
Acq. time 1.992 sec  
Width 6410.3 Hz  
48 repetitions  
OBSERVE H1 400.1252176 MHZ  
DATA PROCESSING  
FT size 32768  
Total time 2 min, 30 sec

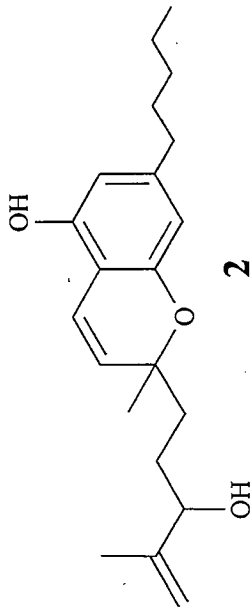

2

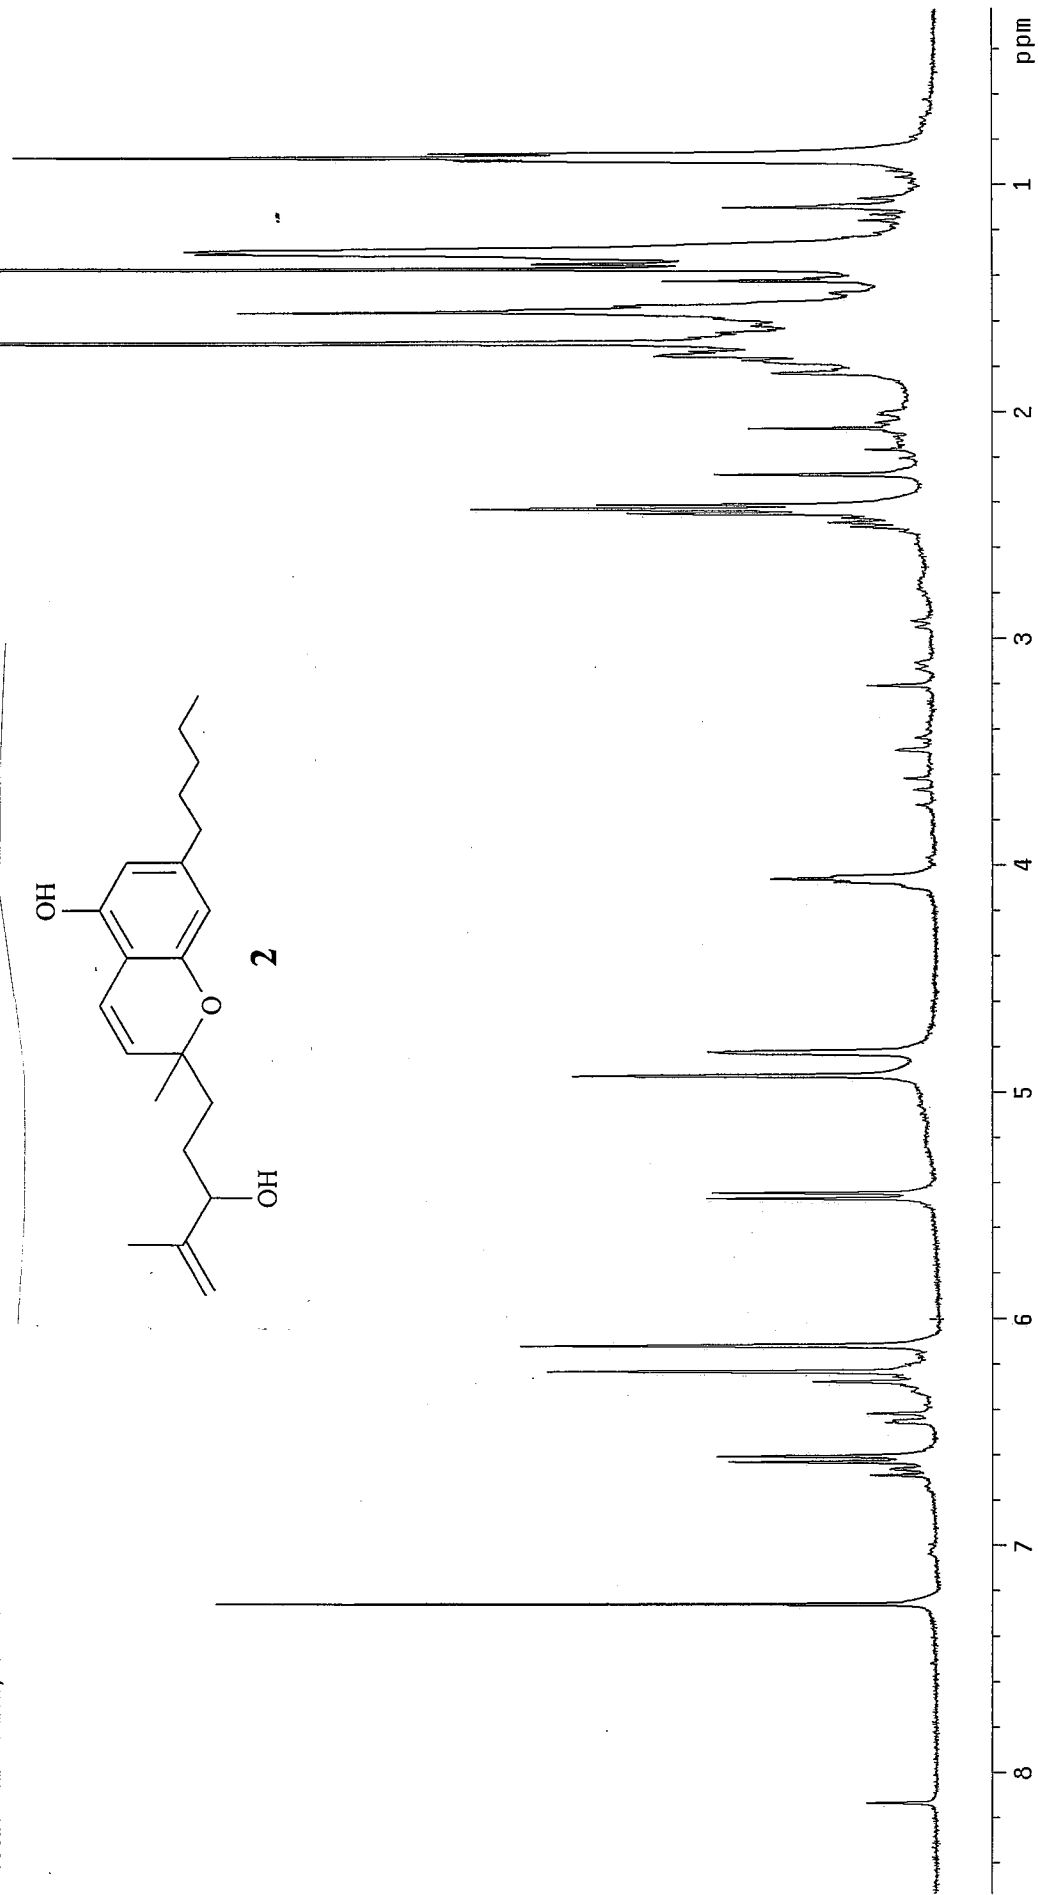

MRR055-02-56-E+F-5

Archive directory: /export/home/mradwan/vnmr/sys/data  
Sample directory:  
File: CARBON

Pulse Sequence: s2pul  
Solvent: pyridine  
Temp. 30.0 C / 303.1 K  
Mercury-400BB "unknown"  
  
Relax. delay 1.000 sec  
Pulse 45.0 degrees  
Acq. time 1.199 sec  
Width 25125.6 Hz  
20000 repetitions  
OBSERVE C13, 100.6115421 MHZ  
DECOUPLE H1, 400.1270939 MHZ  
Power 36 dB  
continuously on  
WALTZ-16 modulated  
DATA PROCESSING  
Line broadening 1.0 Hz  
FI size 65536  
Total time 12 hr, 43 min, 7 sec

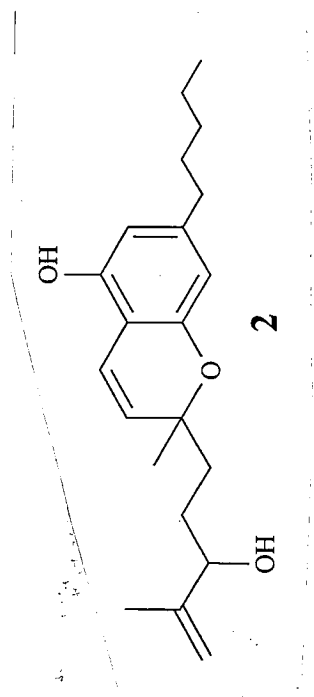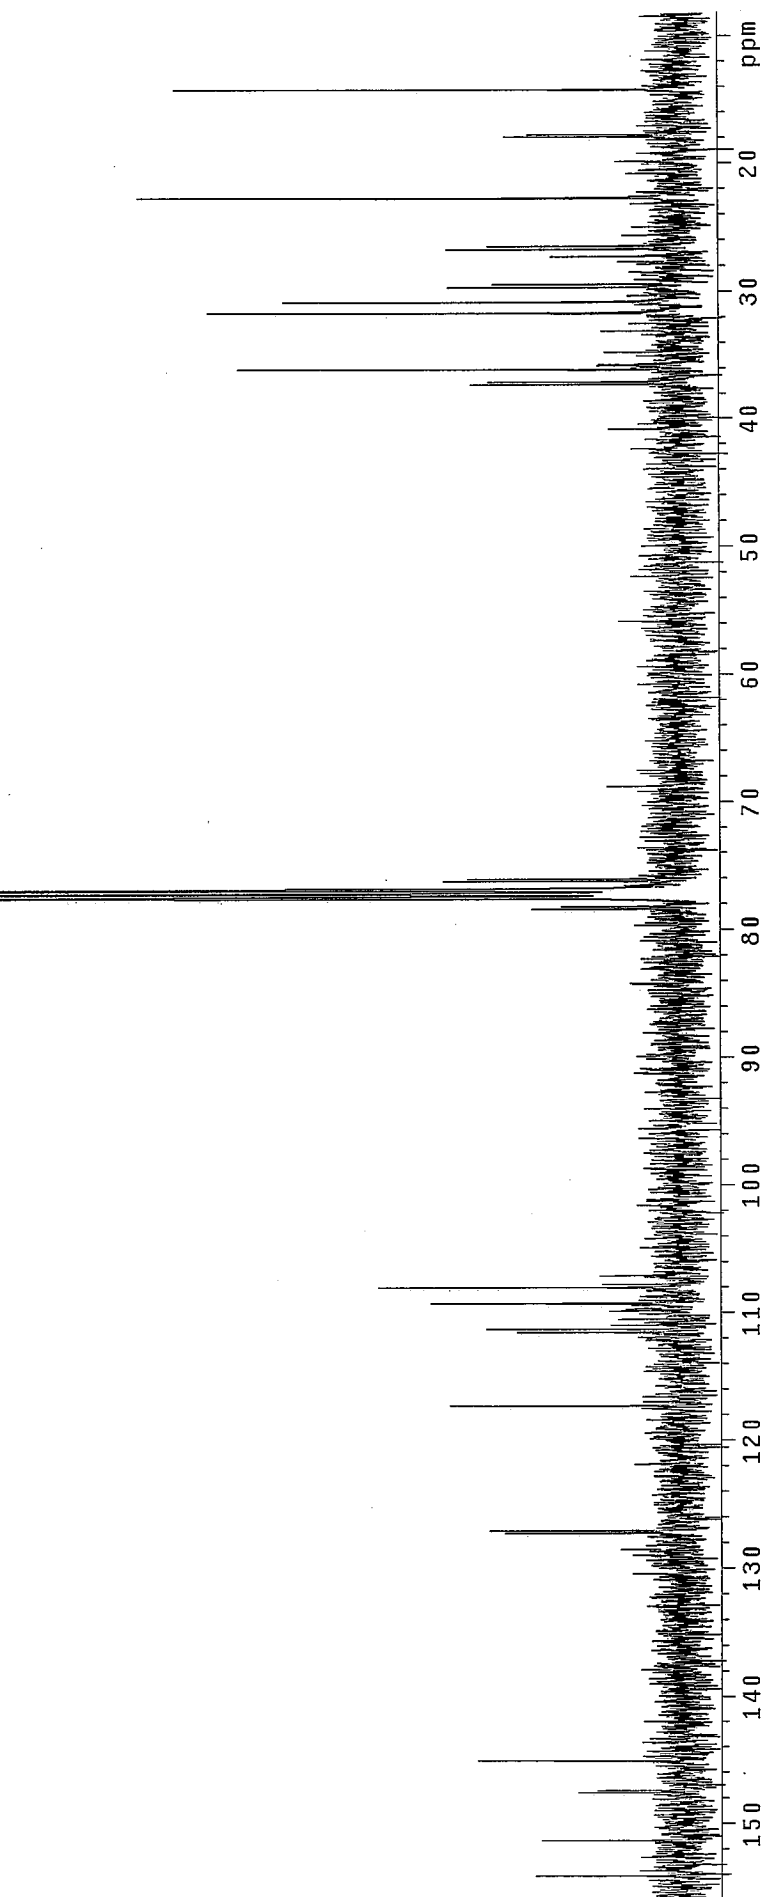



SAA-62-25

SAA-62-25

SAA-62-15

SAA-62-15

Archive directory: /export/home/desmond/vnmr/sys/defaults  
Sample directory: /export/home/desmond/vnmr/sys/defaults  
Pulse Sequence: s2pu1  
Solvent: CDC13  
Ambient temperature: Ambient temperature  
File: carbon  
Mercury-400BB "unknown"  
Relax. delay 1.000 sec  
Pulse 45.0 degrees  
Acq. time 1.199 sec  
Width 25125.6 Hz  
12500 repetitions  
OBSERVE C13, 100.6115420 MHZ  
DECOUPLE H1, 400.1272240 MHZ  
Power 36 dB  
continuously on  
WALTZ-16 modulated  
DATA PROCESSING  
Line broadening 1.0 Hz  
FT size 65536  
Total time 7 hr, 56 min, 58 sec

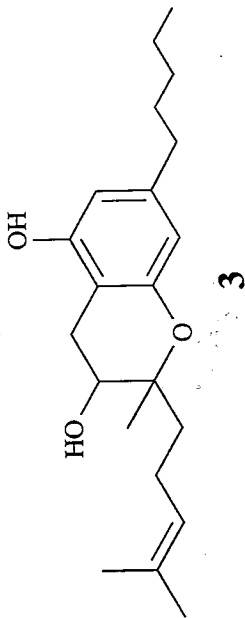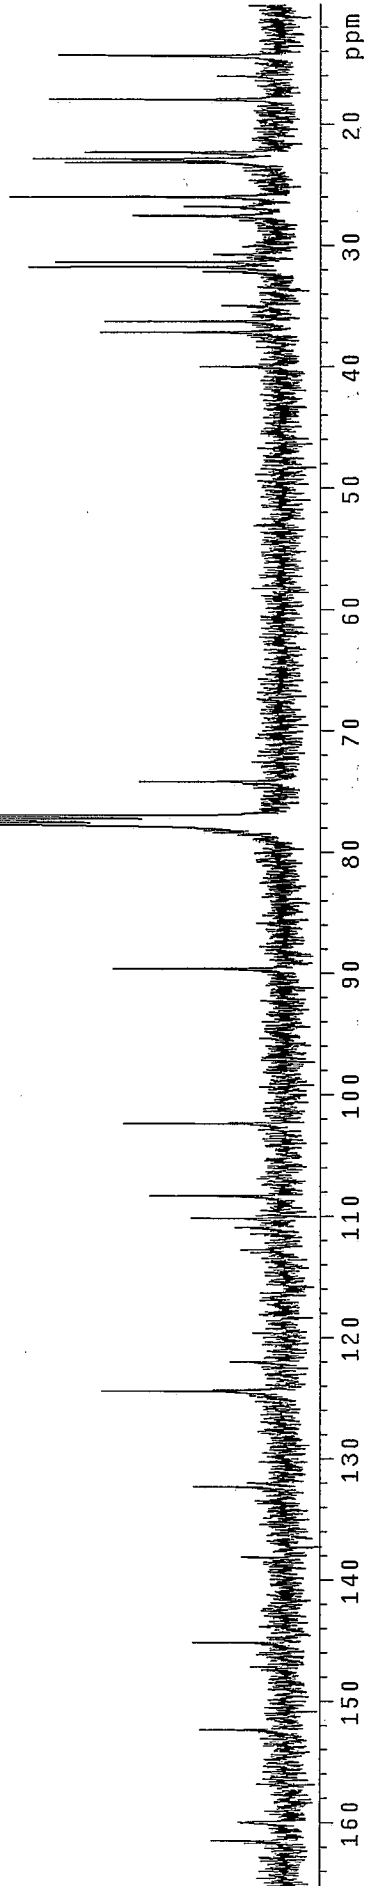

Archive directory: /export/home/mradwan/vnmrSYS/data

Sample directory:  
File: PROTON

Pulse Sequence: s2pul  
Solvent: CDCl3  
Ambient temperature  
Mercury-400BB "unknown"

Relax. delay 1.000 sec  
Pulse 45.0 degrees  
Acq. time 1.992 sec  
Width 6410.3 Hz  
32 repetitions  
OBSERVE H1 400.1252176 MHZ  
DATA PROCESSING  
FT size 32768  
Total time 1 min, 40 sec

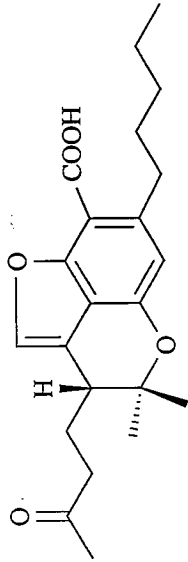

4

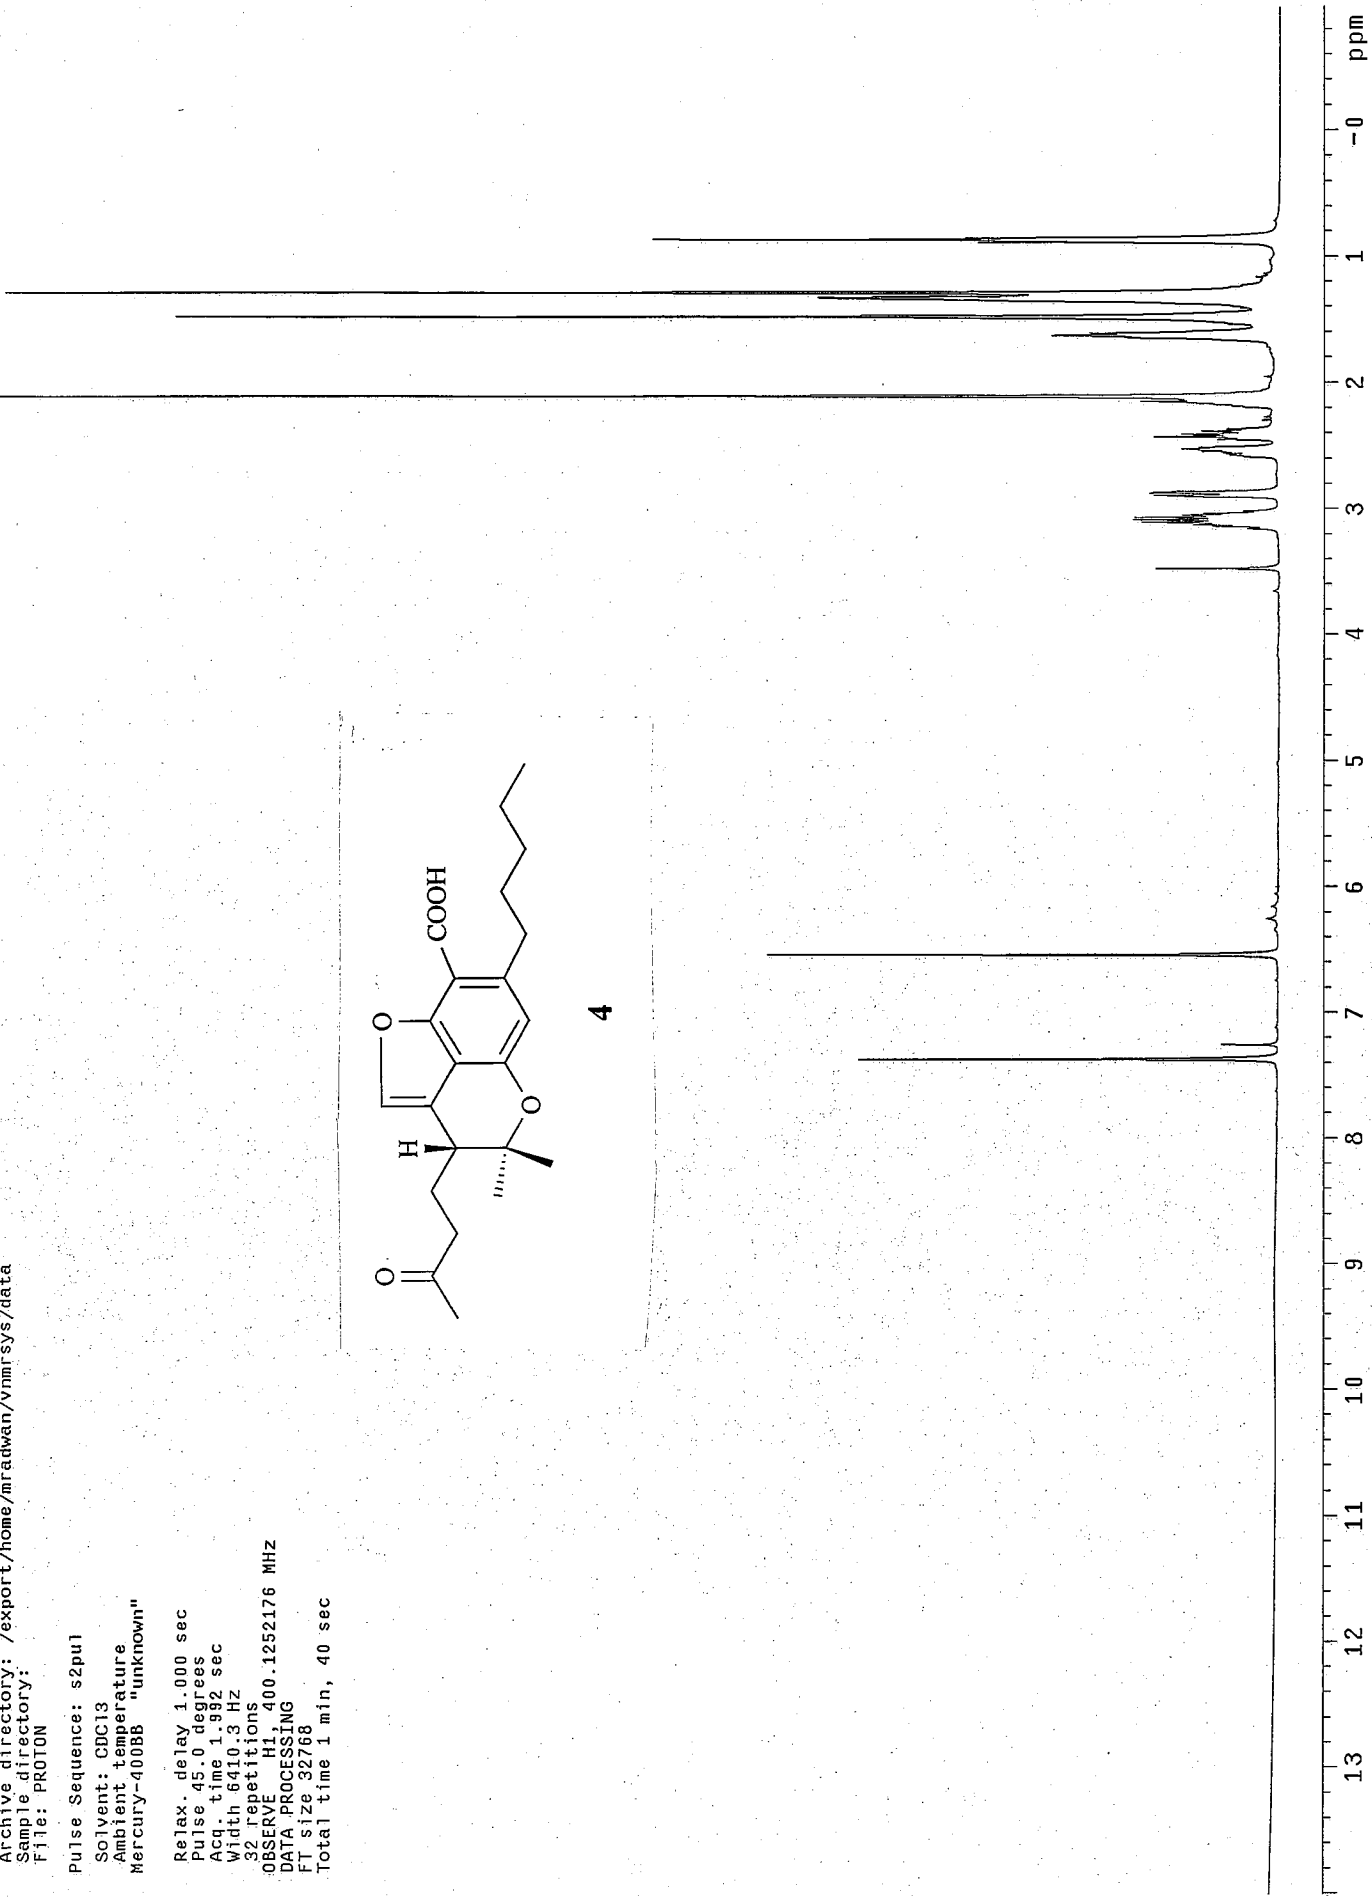

Archive directory: /export/home/mradwan/vnmr/sys/data  
Sample directory:  
File: CARBON

Pulse Sequence: s2pul  
Solvent: CDCl3  
Ambient temperature  
Mercury-400BB "unknown"

Relax. delay 1.000 sec  
Pulse 45.0 degrees  
Acq. time 1.199 sec  
Width 25125.6 Hz  
576 repetitions  
OBSERVE C13, 100.6115420 MHZ  
DECOUPLE H1, 400.1272240 MHZ  
Power 36 dB  
continuously on  
WALTZ-16 modulated  
DATA PROCESSING  
Line broadening 1.0 Hz  
FT size 65536  
Total time 38 min, 10 sec

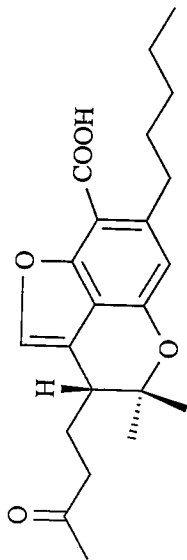

4

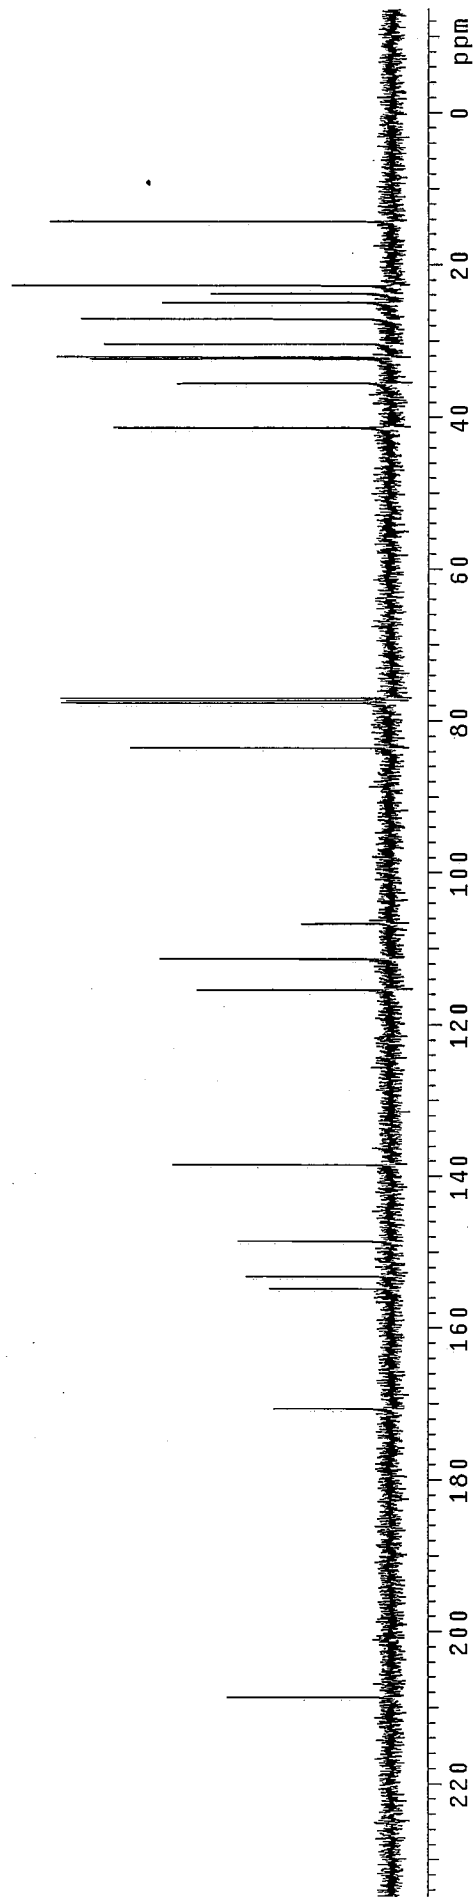



MRR055-03-45-3

Archive directory: /export/home/mradwan/vnmr/55/data  
Sample directory:  
File: PROTON

Pulse Sequence: s2pu1  
Solvent: CDC13  
Ambient temperature  
Mercury-400BB "unknown"

Relax. delay 1.000 sec  
Pulse 45.0 degrees  
Acq. time 1.992 sec  
Width 6410.3 Hz  
16 repetitions

OBSERVE H1, 400.1252176 MHz  
DATA PROCESSING  
FT size 32768  
Total time 0 min, 50 sec

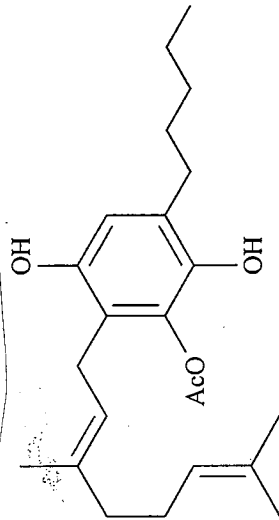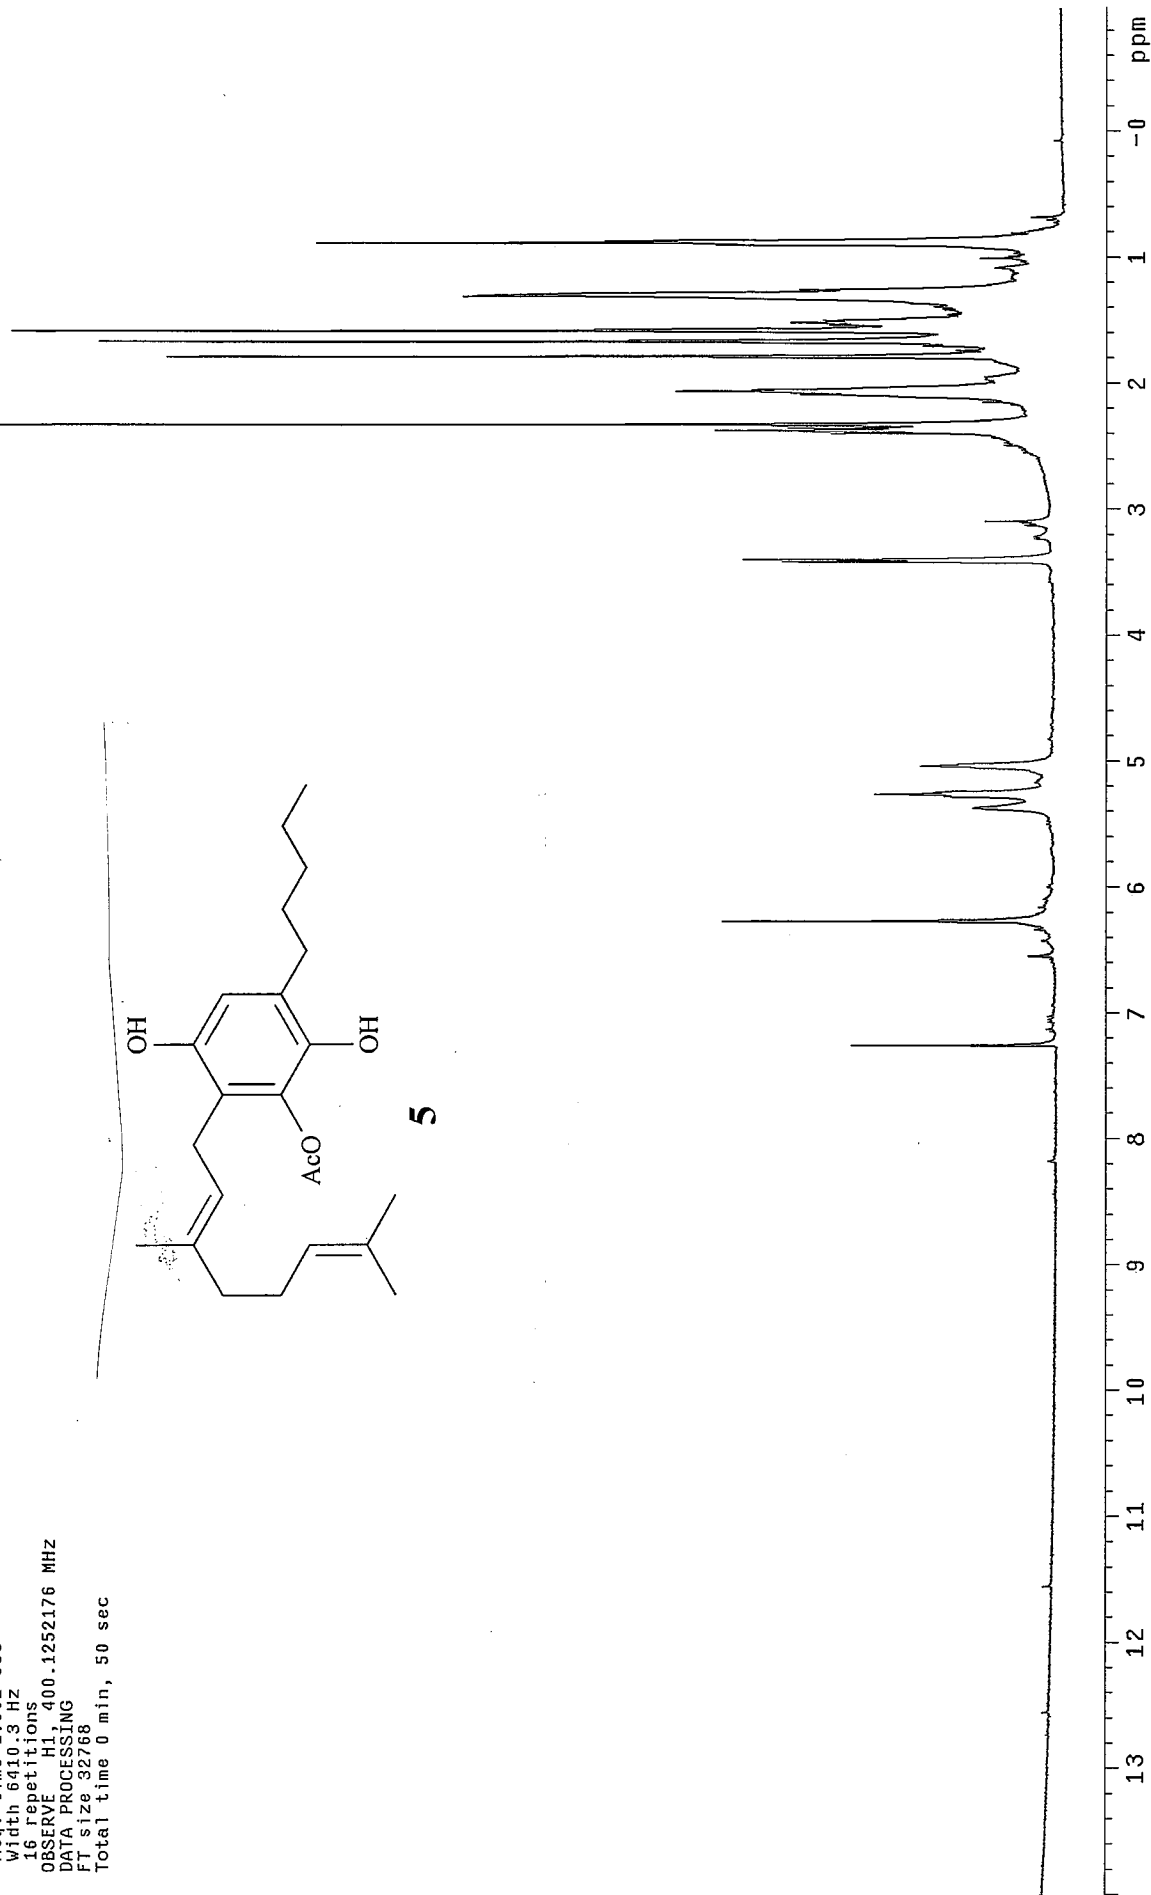

Archive directory: /export/home/mradwan/vnmr/sys/data  
Sample directory:  
File: CARBON

Pulse Sequence: s2pul  
Solvent: CDCl3  
Ambient temperature  
Mercury-40088 "unknown"

Relax. delay 1.000 sec  
pulse 45.0 degrees  
Acq. time 1.139 sec  
Width 25129.6 Hz  
500 repetitions  
OBSERVE C13, 100.6115420 MHZ  
DECOUPLE H1, 400.1272240 MHZ  
power 36 dB  
continuously on  
WALTZ-16 modulated  
DATA PROCESSING  
Line broadening 1.0 Hz  
FT size 65536  
Total time 3 hr, 29 min, 51 sec

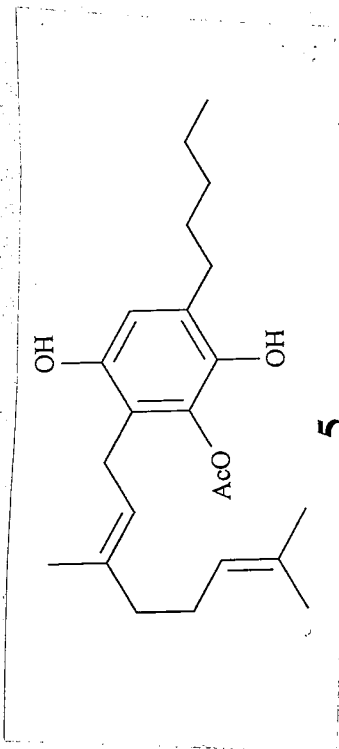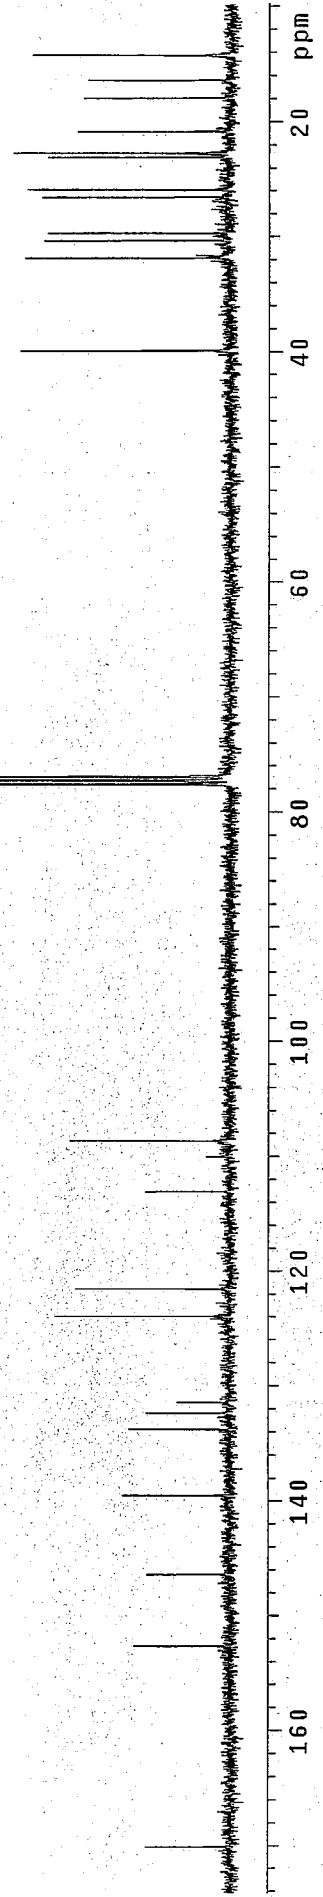

SAAB-II-10-11

SAAB-10-11

Archive directory: /export/home/mradwan/vnmr/sys/data/10-11-11/SAAB-10-11  
Sample directory: /export/home/mradwan/vnmr/sys/data/10-11-11/SAAB-10-11/SAAB-10-11  
File: PROTON

Pulse Sequence: s2pu1  
Solvent: CDCl3  
Ambient temperature  
Mercury-400BB "unknown"  
Relax. delay 1.000 sec  
Pulse 45.0 degrees  
Acq. time 1.992 sec  
Width 6410.3 Hz  
16 repetitions  
OBSERVE H1 400.1252176 MHz  
DATA PROCESSING  
FT size 32768  
Total time 0 min, 50 sec

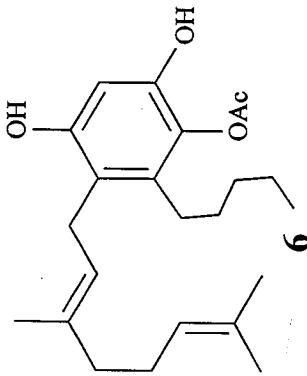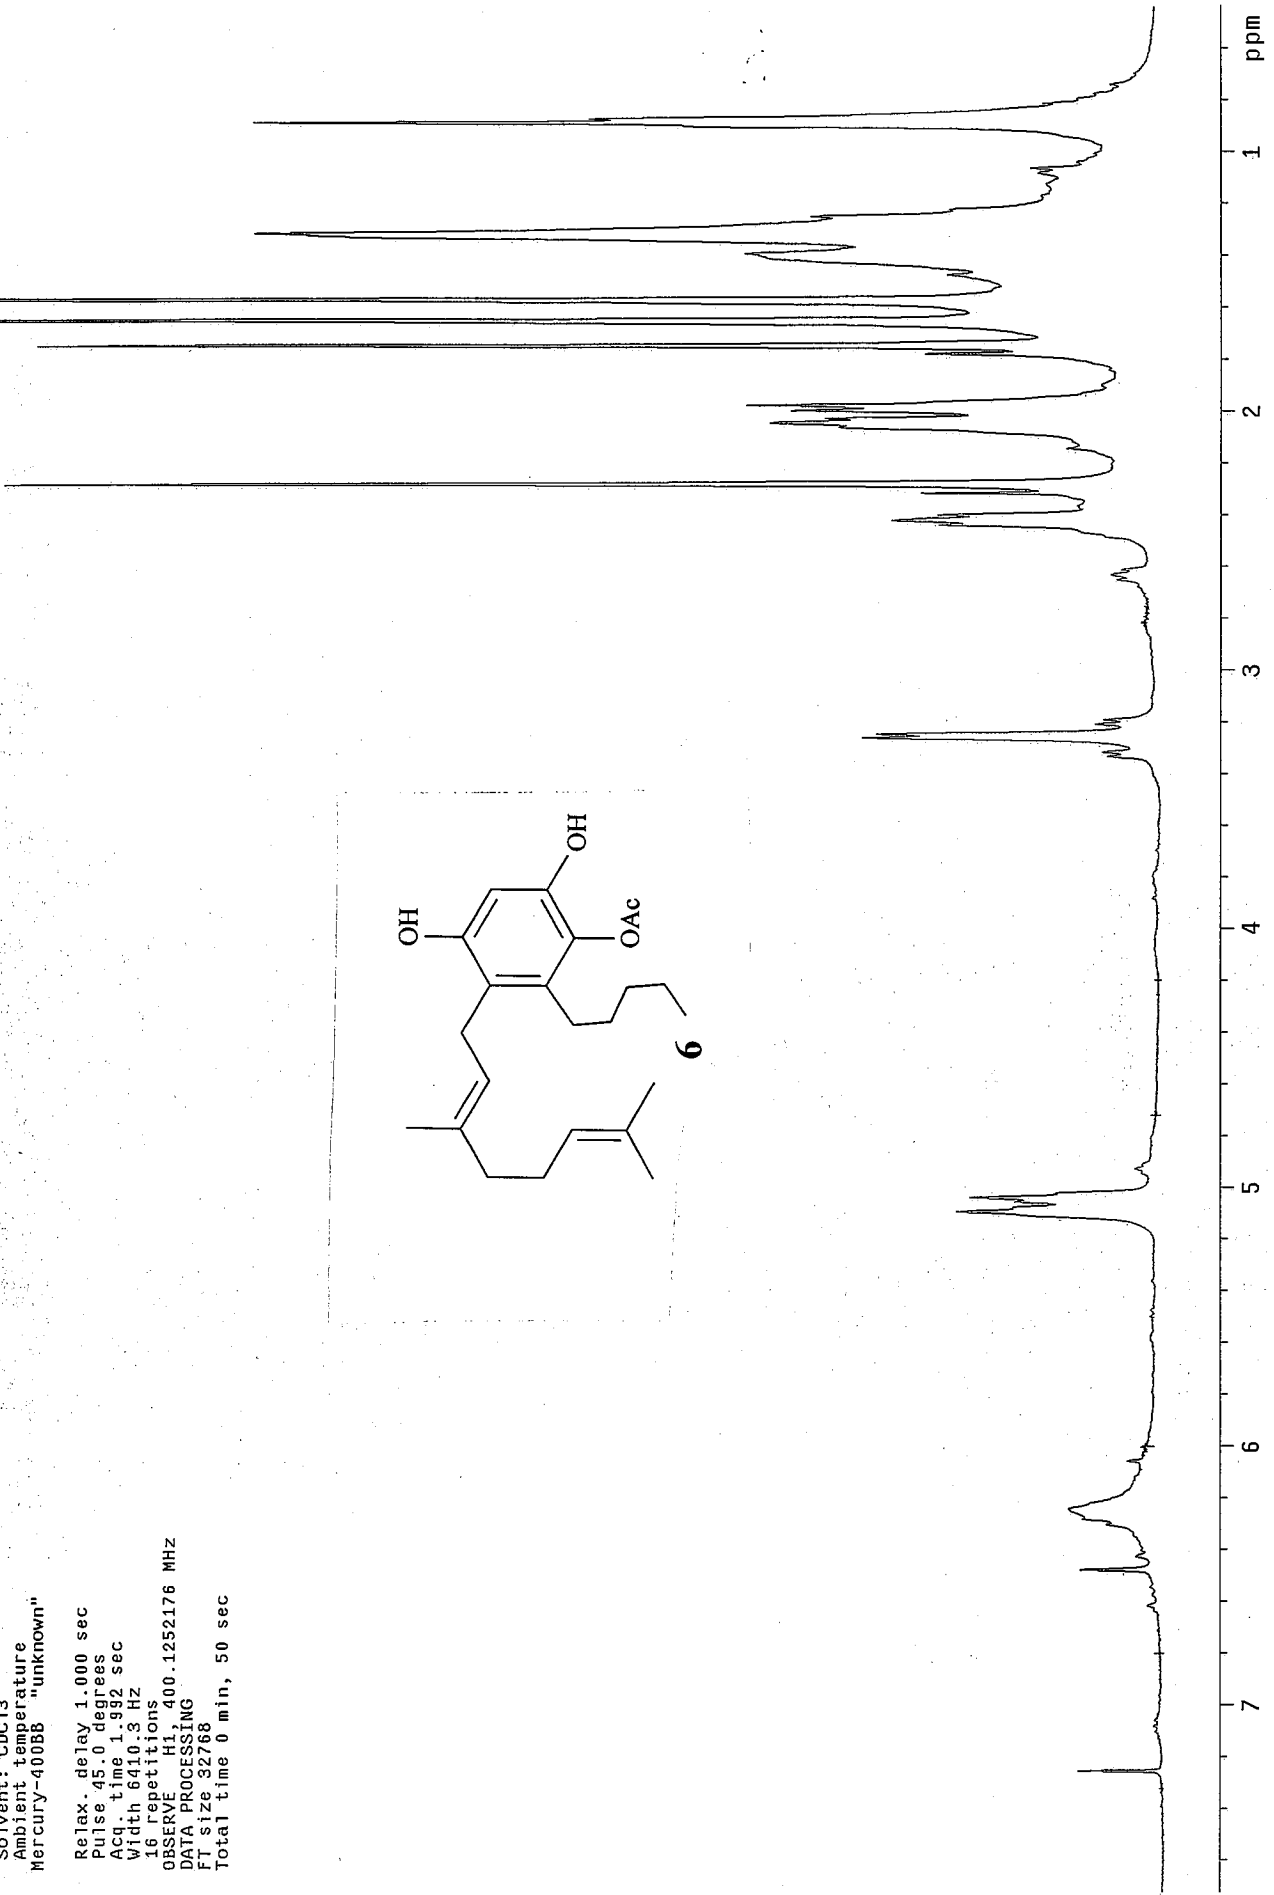

SAAB-B-II-10-11

SAAB-B-II-10-11

3725-11-19-0

3042-9-11-84

Archive directory: /export/home/mradwan/vnmrSYS/data/chems/derivatives/SAAB-B-II-10-11/3725-11-19-0/3042-9-11-84

Sample directory:

Sample file name:

Sample file size:

Sample file date:

Pulse Sequence: s2pul

Solvent: CDC13

Ambient temperature

File: carbon

Mercury-400BB "unknown"

Pulse Sequence: s2pul

Solvent: CDC13

Ambient temperature

File: carbon

Mercury-400BB "unknown"

Pulse Sequence: s2pul

Solvent: CDC13

Ambient temperature

File: carbon

Mercury-400BB "unknown"

Pulse Sequence: s2pul

Solvent: CDC13

Ambient temperature

File: carbon

Mercury-400BB "unknown"

Relax. delay 1.000 sec  
Pulse 45.0 degrees  
Acq. time 1.199 sec  
Width 25125.6 Hz  
200 repetitions  
OBSERVE C13, 100.6115420 MHZ  
DECOUPLE H1, 400.1272240 MHZ  
Power 36 dB,  
continuously on  
WALTZ-16 modulated  
DATA PROCESSING  
Line broadening 1.0 Hz  
FT size 65536  
Total time 7 min, 41 sec

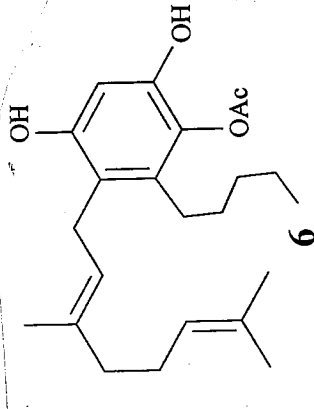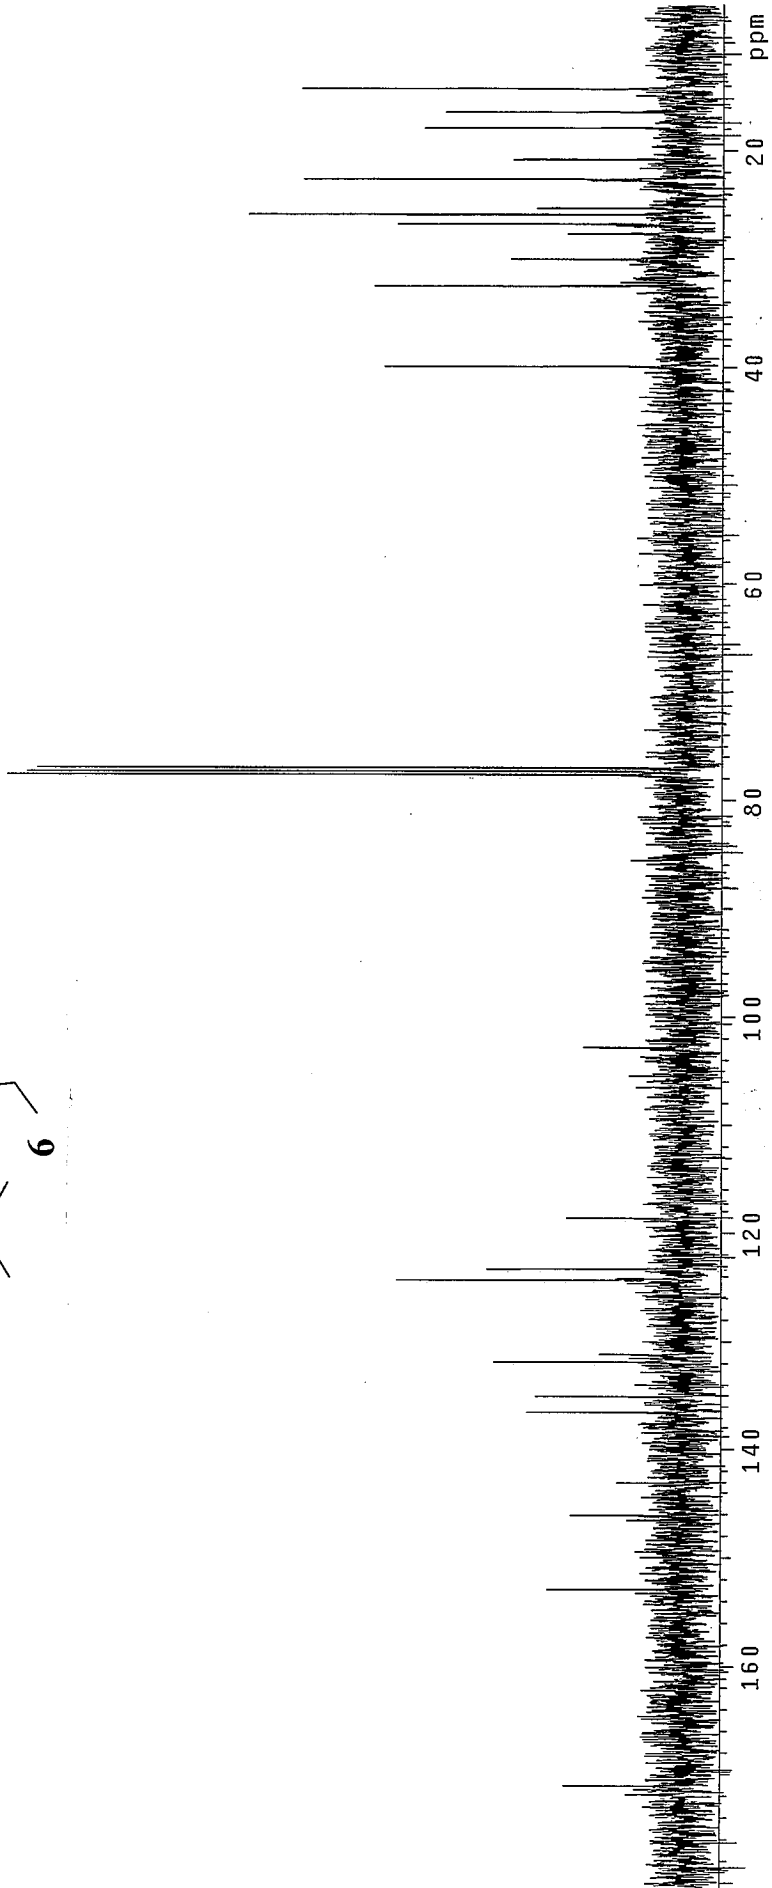

MRR055-01-82-41-48

Archive directory: /export/home/mradwan/vnmrSYS/data  
Sample directory:  
File: PROTON

Pulse Sequence: s2pu1  
Solvent: CDCl3  
Ambient temperature  
Mercury-400BB "unknown"

Relax. delay 1.000 sec  
Pulse 45.0 degrees  
Acq. time 1.992 sec  
Width 6410.3 Hz  
16 repetitions  
OBSERVE H1, 400.1252176 MHz  
DATA PROCESSING  
FT size 32768  
Total time 0 min, 50 sec

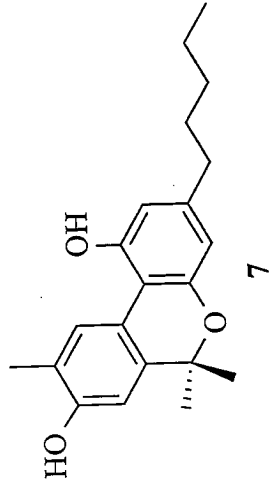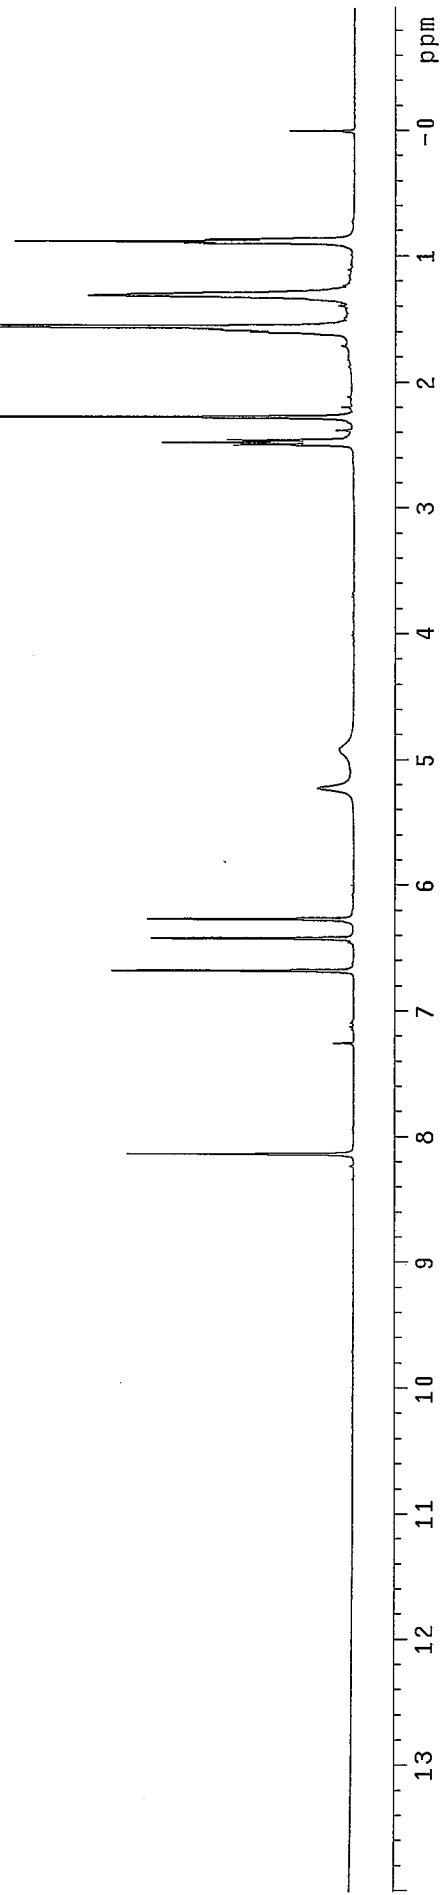

MRROSS-01-82-41-48

Archive directory: /export/home/mradwan/vnmrSYS/data  
Sample directory:  
File: CARBON

Pulse Sequence: s2pul  
Solvent: CDCl3  
Ambient temperature  
Mercury-40088 "unknown"

Relax. delay 1.000 sec  
Pulse 45.0 degrees  
Acq. time 1.199 sec  
Width 25125.6 Hz  
1000 repetitions  
OBSERVE C13, 100.6115420 MHZ  
DECOUPLE H1, 400.1272240 MHZ  
Power 36 dB  
continuously on  
WALTZ-16 modulated  
DATA PROCESSING  
Line broadening 1.0 Hz  
FT size 65536  
Total time 38 min, 10 sec

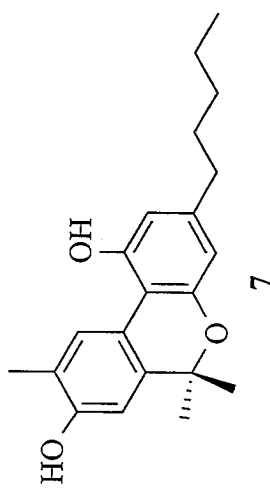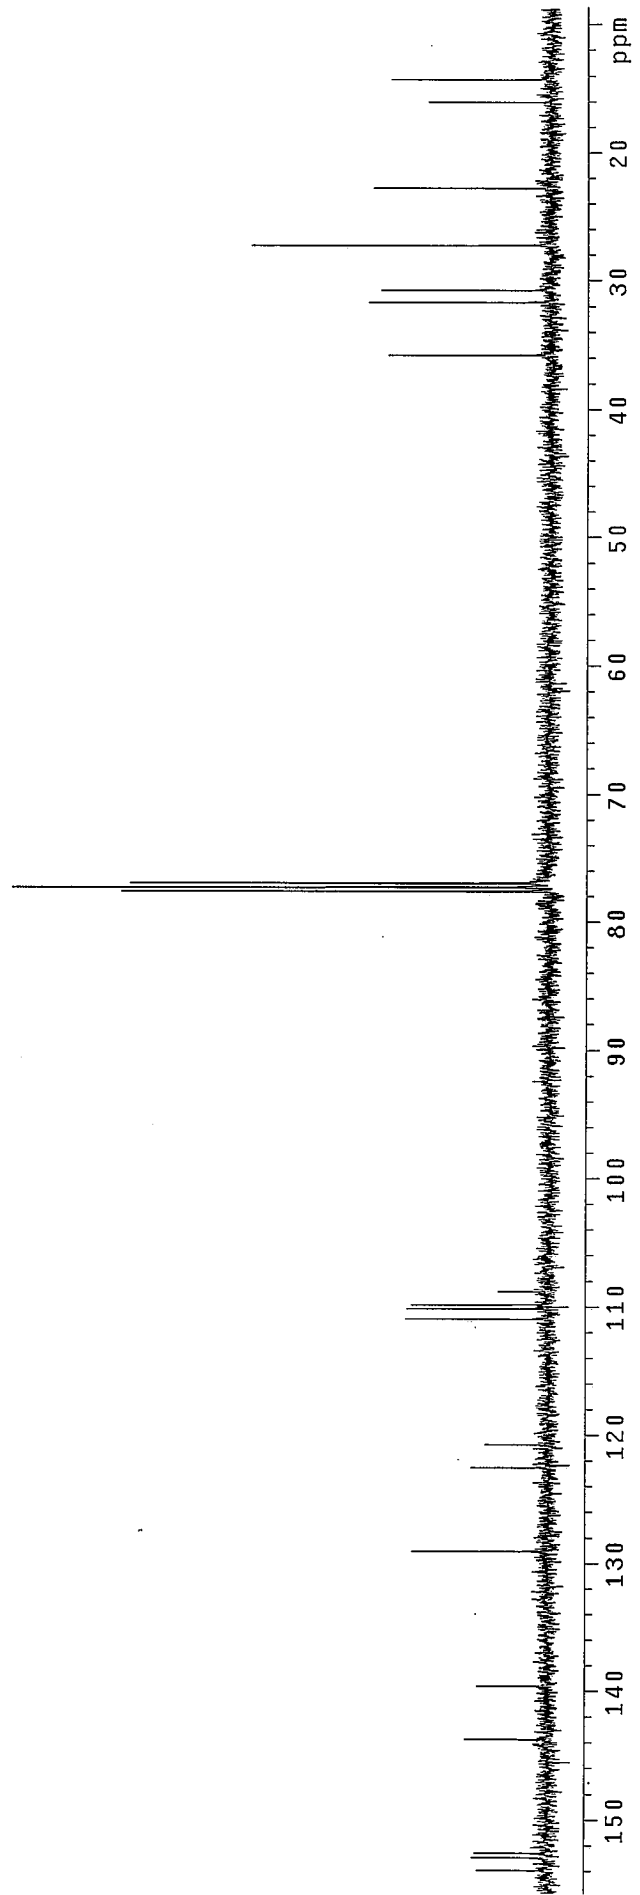

Archive directory: /export/home/desmond/vnmrsvs/data/13130017/20011019\_123025\_001.f2  
Sample directory: /export/home/desmond/vnmrsvs/data/13130017/20011019\_123025\_001.f2  
File: PROT01

Pulse Sequence: s2pul  
Solvent: CDCl3  
Temp: 45.0 C / 318.1 K  
Mercury-400BB "unknown"  
  
Relax. delay 1.000 sec  
Pulse 45.0 degrees  
Acq. time 1.992 sec  
Width 6410.3 Hz  
128 repetitions  
OBSERVE H1, 400.1252176 MHz  
DATA PROCESSING  
FT size 32768  
Total time 6 min, 40 sec

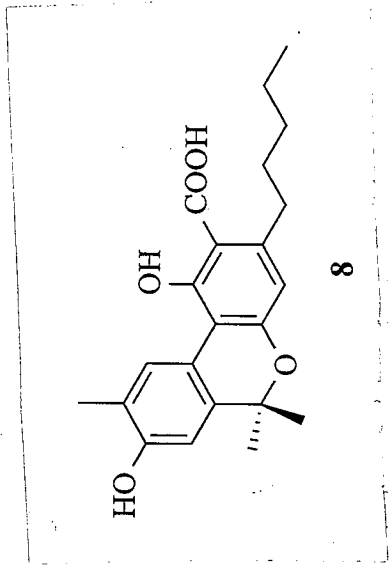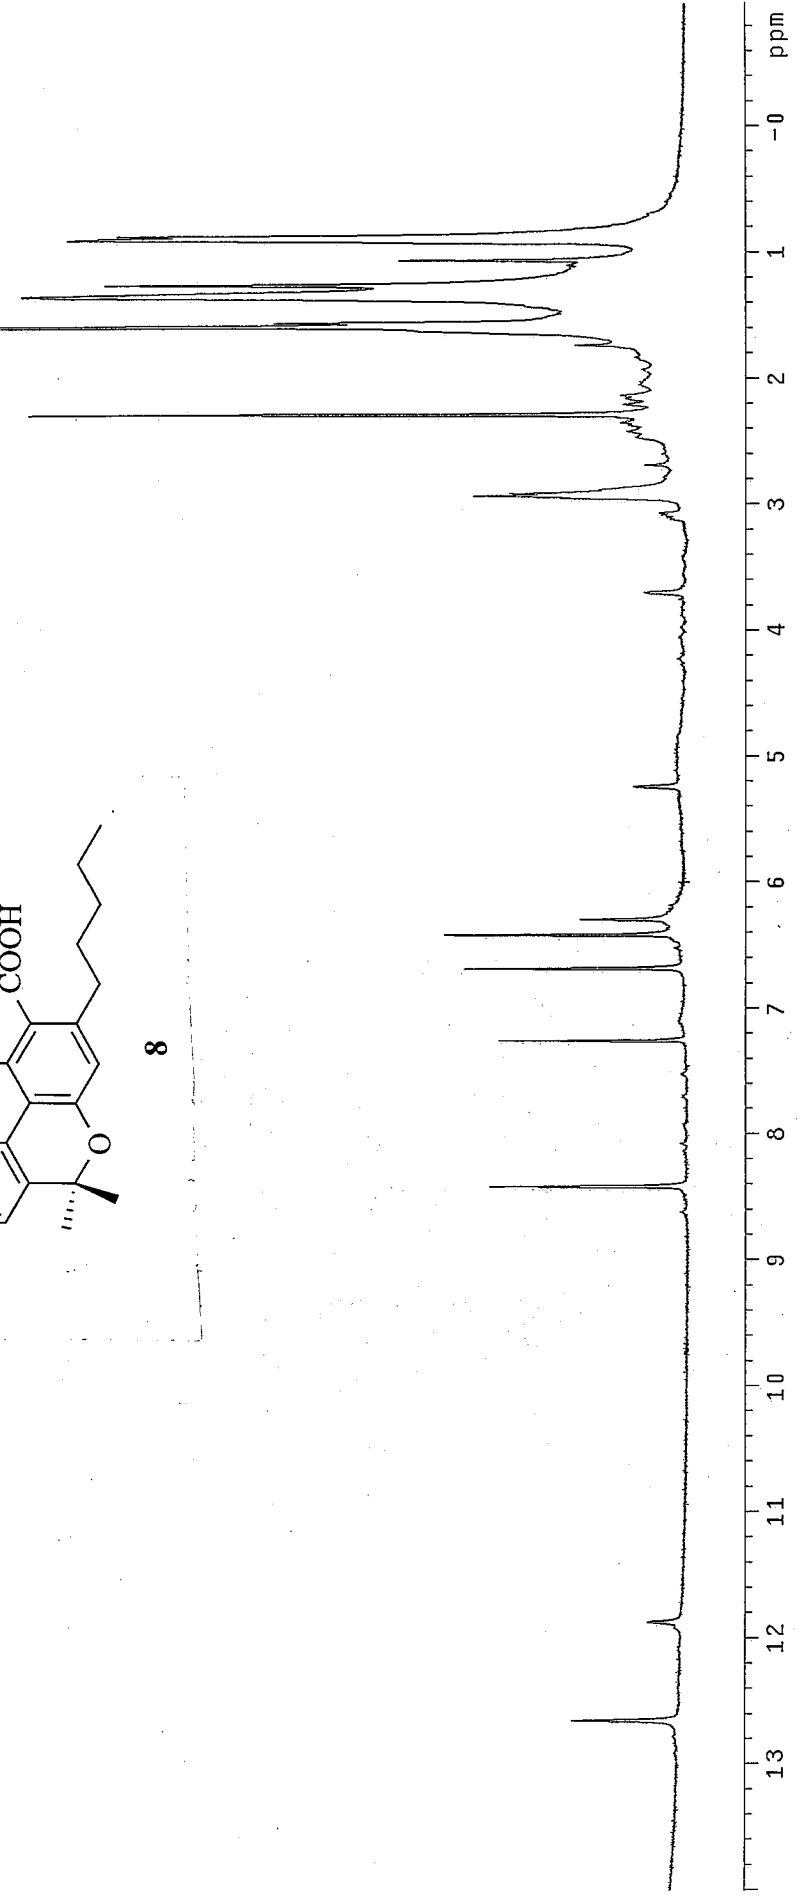

Archive directory: /export/home/desmond/vnmr/sys/data/hiv  
Sample directory: /export/home/desmond/vnmr/sys/data/hiv  
File: CARBON  
Pulse Sequence: s2pu1  
Solvent: CDCl3  
Temp: 45.0 C / 318.1 K  
Mercury-400BB "unknown"  
Relax. delay 1.000 sec  
Pulse 45.0 degrees  
Acq. time 1.199 sec  
Width 25125.6 Hz  
17000 repetitions  
OBSERVE C13, 100.6115420 MHZ  
DECOUPLE H1, 400.1272240 MHZ  
Power 36 dB,  
continuously on  
WALTZ-16 modulated  
DATA PROCESSING  
Line broadening 1.0 Hz  
FT size 65536  
Total time 10 hr, 48 min, 39 sec

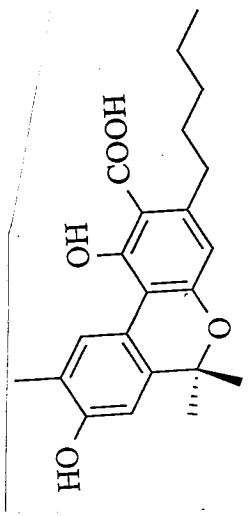

8

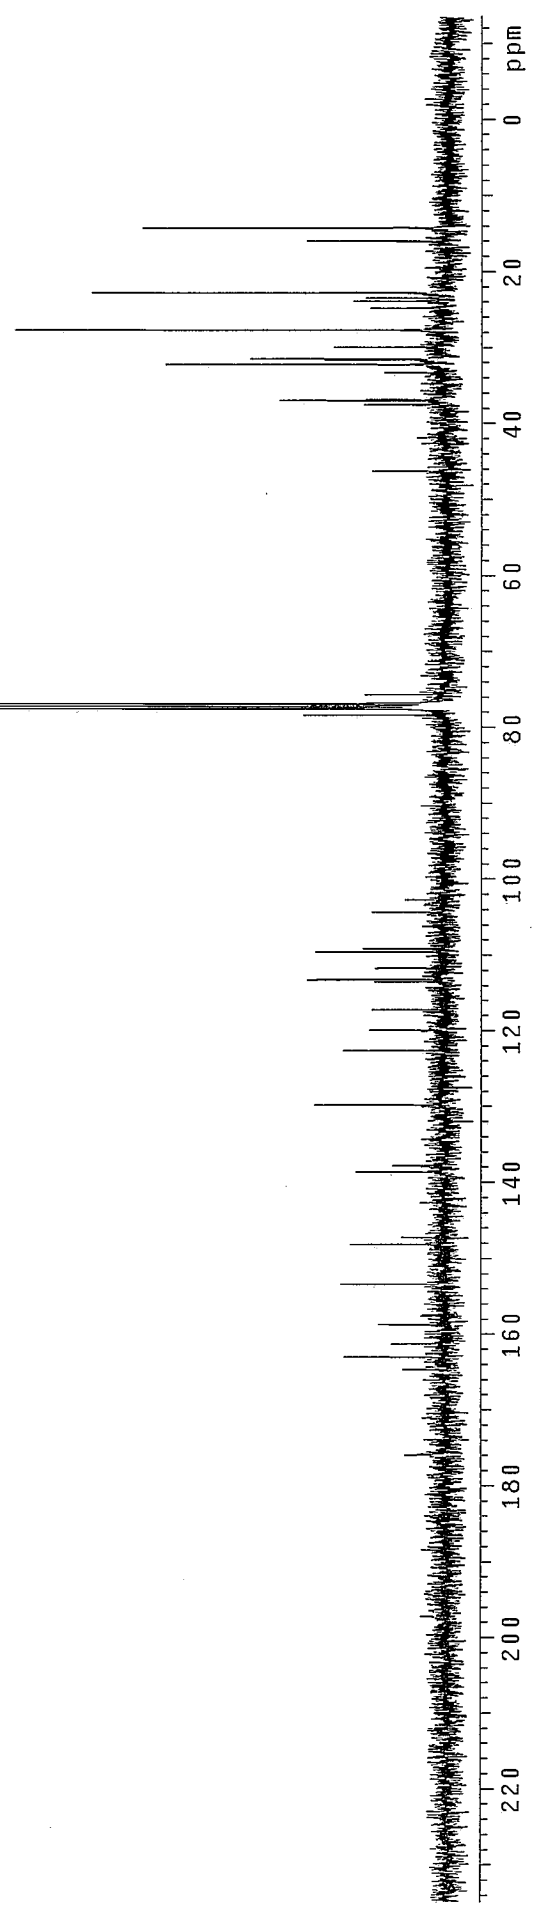





SAAB-II-38-11

Archive directory: /export/home/mradwan/vnmrSys/data  
Sample directory:  
File: CARBON

Pulse Sequence: s2pu1

Solvent: CDC13  
Temp. 35.0 C / 308.1 K  
Mercury-400BB "unknown"

Relax. delay 1.000 sec  
Pulse 45.0 degrees  
Acq. time 1.199 sec  
Width 25125.6 Hz  
10000 repetitions  
OBSERVE C13, 100.6115420 MHZ  
DECOUPLE H1, 400.1272240 MHZ  
Power 36 dB  
continuously on  
WALTZ-16 modulated  
DATA PROCESSING  
Line broadening 1.0 Hz  
FT size 65536  
Total time 6 hr, 21 min, 35 sec

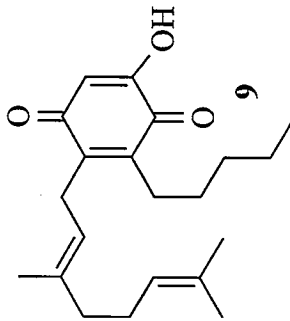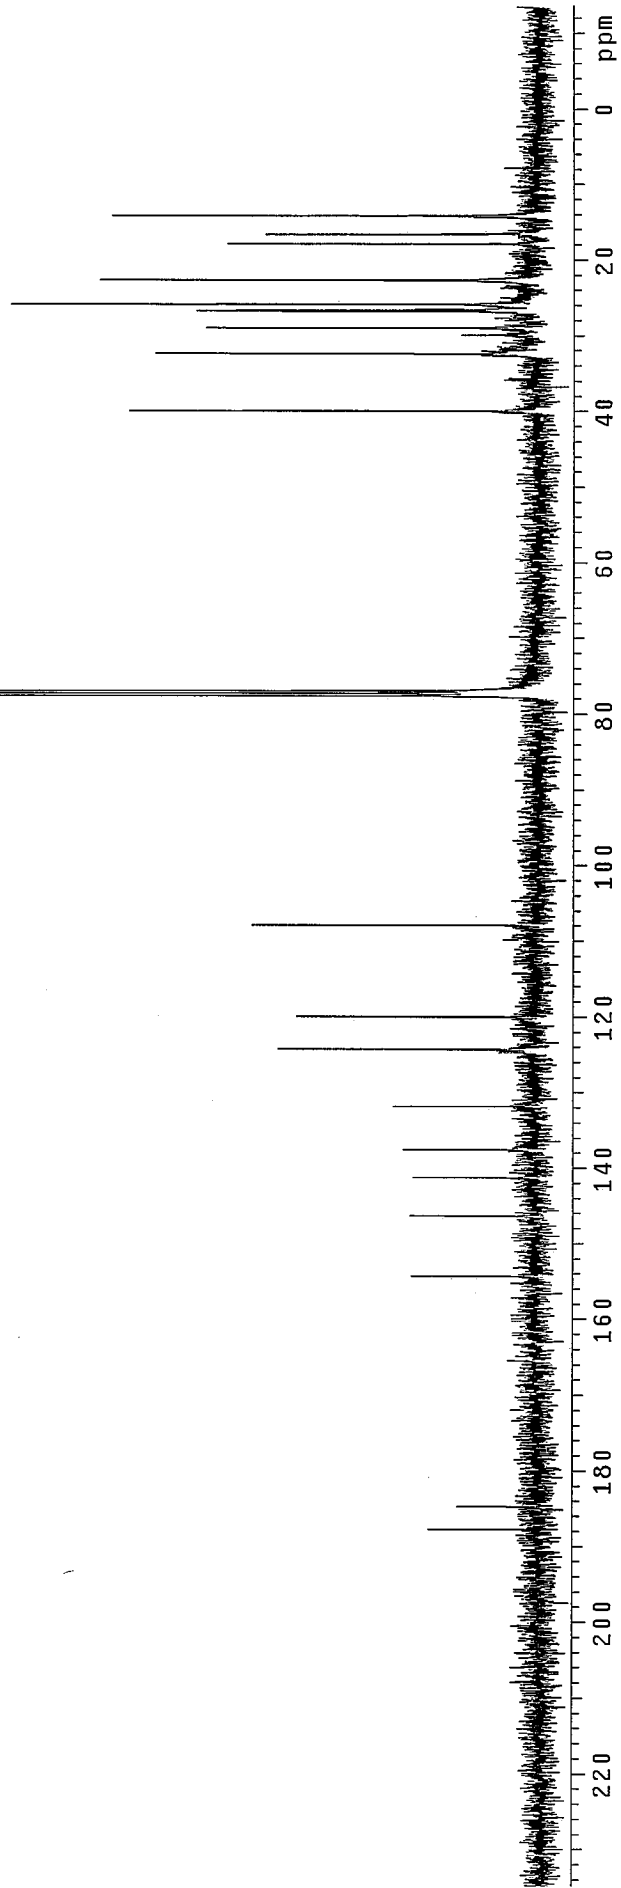

Supplement: NIHMS787527-supplement-SI.pdf [file NIHMS787527-supplement-SI.pdf]
